# Supplementary material
Source: PubMed Central journal article supplement (PMC6541553)
Supplement: NIHMS1512391-supplement-Supplementary.pdf [file NIHMS1512391-supplement-Supplementary.pdf]

## SUPPLEMENTAL MATERIAL.

### Prediction of Ischemic Stroke or Transient Ischemic Attack in Atrial Fibrillation Using the CHA<sub>2</sub>DS<sub>2</sub>-VASc Score in Whites, Blacks, and Hispanics

| <b>Page</b> | <b>Description</b>                                                                                                                                                                              |
|-------------|-------------------------------------------------------------------------------------------------------------------------------------------------------------------------------------------------|
| 2           | Table I. ICD-9 codes for covariates                                                                                                                                                             |
| 3           | Table II. Incidence of Ischemic Stroke or TIA Among Atrial Fibrillation Patients, Stratified by Race/Ethnicity (censoring at initiation of oral anticoagulants), Optum Clinformatics, 2009-2015 |
| 4           | Table III. Negative Predictive Value and Positive Predictive Value of the CHA <sub>2</sub> DS <sub>2</sub> -VASc Score for Ischemic Stroke or TIA                                               |
| 5           | Table IV. Odds Ratio of the CHA <sub>2</sub> DS <sub>2</sub> -VASc Score for Ischemic Stroke or TIA One Year After Diagnosis of Atrial Fibrillation                                             |
| 6           | Table V. C-statistic of CHA <sub>2</sub> DS <sub>2</sub> -VASc for 1-Year Prediction of Ischemic Stroke or TIA Among Atrial Fibrillation Patients, Optum Clinformatics, 2009-2015               |
|             | <b>Supplemental material figure legends</b>                                                                                                                                                     |
| 7           | Figure I. Kaplan-Meier curve for ischemic stroke and TIA by race/ethnicity                                                                                                                      |
| 8           | Figure II. Kaplan-Meier curves for ischemic stroke by race/ethnicity                                                                                                                            |
| 9           | Figure III. Incidence of ischemic stroke or TIA, censoring for oral anticoagulant                                                                                                               |
| 10          | Figure IV. Incidence of ischemic stroke or TIA, nongender risk factors                                                                                                                          |

**Table I. ICD-9 Codes for Covariates**

|                           |                                                                                                |
|---------------------------|------------------------------------------------------------------------------------------------|
| Heart failure             | 398.91, 402.01, 402.11, 402.91, 404.01, 404.03, 404.13, 404.91, 404.93, 425.4x, 425.9x, 428.xx |
| Hypertension              | 401.xx, 402.xx, 403.xx, 404.xx, 405.xx                                                         |
| Diabetes                  | 250.xx                                                                                         |
| Myocardial infarction     | 410.xx, 412.xx                                                                                 |
| Peripheral artery disease | 440.0x, 440.2x, 440.9x, 443.9x                                                                 |
| Ischemic stroke           | 433.xx, 434.xx, 435.xx, 436.xx, 437.xx, 438.xx                                                 |

| <b>Table II. Incidence of Ischemic Stroke or TIA Among Atrial Fibrillation Patients, Stratified by Race/Ethnicity (censoring at initiation of oral anticoagulants), Optum Clinformatics, 2009-2015</b> |                   |                   |                   |                   |
|--------------------------------------------------------------------------------------------------------------------------------------------------------------------------------------------------------|-------------------|-------------------|-------------------|-------------------|
|                                                                                                                                                                                                        | All               | Whites            | Blacks            | Hispanics         |
| <b>Ischemic stroke or TIA, N</b>                                                                                                                                                                       | 5,168             | 4,257             | 503               | 408               |
| Person-years                                                                                                                                                                                           | 392,701           | 333,412           | 30,137            | 29,153            |
| Incidence rate*                                                                                                                                                                                        | 1.32 (1.28, 1.35) | 1.28 (1.24, 1.32) | 1.67 (1.53, 1.82) | 1.40 (1.27, 1.54) |
| <b>Ischemic stroke, N</b>                                                                                                                                                                              | 4,217             | 3,461             | 419               | 337               |
| Person-years                                                                                                                                                                                           | 393,968           | 334,485           | 30,245            | 29,238            |
| Incidence rate*                                                                                                                                                                                        | 1.07 (1.04, 1.10) | 1.03 (1.00, 1.07) | 1.39 (1.26, 1.52) | 1.15 (1.03, 1.28) |

\* Per 100 person-years (95% confidence interval)

**Table III. Negative Predictive Value and Positive Predictive Value of the CHA<sub>2</sub>DS<sub>2</sub>-VASc Score for Ischemic Stroke or TIA**

Without censoring for initiation of OAC

| CHA <sub>2</sub> DS <sub>2</sub> -VASc                         | No ischemic stroke or TIA | Ischemic stroke or TIA |           |
|----------------------------------------------------------------|---------------------------|------------------------|-----------|
| ≥1                                                             | 251560                    | 6160                   | PPV: 2.4  |
| <1                                                             | 9657                      | 42                     | NPV: 99.6 |
| ≥2                                                             | 229965                    | 6054                   | PPV: 2.6  |
| <2                                                             | 31252                     | 148                    | NPV: 99.5 |
| ≥3                                                             | 199578                    | 5726                   | PPV: 2.8  |
| <3                                                             | 61639                     | 476                    | NPV: 99.2 |
| NPV: Negative predictive value. PPV: Positive predictive value |                           |                        |           |

Censoring for initiation of OAC

| CHA <sub>2</sub> DS <sub>2</sub> -VASc                         | No ischemic stroke or TIA | Ischemic stroke or TIA |           |
|----------------------------------------------------------------|---------------------------|------------------------|-----------|
| ≥1                                                             | 252583                    | 5137                   | PPV: 2.0  |
| <1                                                             | 9668                      | 31                     | NPV: 99.7 |
| ≥2                                                             | 230967                    | 5052                   | PPV: 2.1  |
| <2                                                             | 31284                     | 116                    | NPV: 99.6 |
| ≥3                                                             | 200522                    | 4782                   | PPV: 2.3  |
| <3                                                             | 61729                     | 386                    | NPV: 99.4 |
| NPV: Negative predictive value. PPV: Positive predictive value |                           |                        |           |

**Table IV. Odds Ratio of the CHA<sub>2</sub>DS<sub>2</sub>-VASc Score for Ischemic Stroke or TIA One Year After Diagnosis of Atrial Fibrillation**

| Without censoring for initiation of OAC      |         |              |
|----------------------------------------------|---------|--------------|
| CHA <sub>2</sub> DS <sub>2</sub> -VASc score | OR      | 95% CI       |
| 0                                            | 1 (REF) |              |
| 1                                            | 1.13    | (0.79, 1.61) |
| 2                                            | 2.48    | (1.80, 3.42) |
| ≥3                                           | 6.59    | (4.86, 8.94) |
| Censoring for initiation of OAC              |         |              |
| CHA <sub>2</sub> DS <sub>2</sub> -VASc score | OR      | 95% CI       |
| 0                                            | 1 (REF) |              |
| 1                                            | 1.23    | (0.81, 1.85) |
| 2                                            | 2.76    | (1.90, 4.01) |
| ≥3                                           | 7.43    | (5.22, 10.6) |

**Table V.** C-statistic of CHA<sub>2</sub>DS<sub>2</sub>-VAsC for 1-Year Prediction of Ischemic Stroke or TIA Among Atrial Fibrillation Patients, Optum Clinformatics, 2009-2015

|                                                                                                     | <b>C-statistic</b> | <b>95% CI</b> |
|-----------------------------------------------------------------------------------------------------|--------------------|---------------|
| CHA <sub>2</sub> DS <sub>2</sub> -VAsC variables                                                    | 0.691              | 0.683, 0.699  |
| CHA <sub>2</sub> DS <sub>2</sub> -VAsC variables +<br>race/ethnicity                                | 0.692              | 0.684, 0.701  |
| CHA <sub>2</sub> DS <sub>2</sub> -VAsC variables +<br>race/ethnicity +<br>race/ethnicity*individual | 0.692              | 0.684, 0.701  |
| CHA <sub>2</sub> DS <sub>2</sub> -VAsC variables                                                    |                    |               |

CHA<sub>2</sub>DS<sub>2</sub>-VAsC variables: congestive heart failure, hypertension, age, diabetes mellitus, stroke or TIA, complicated vascular disease (myocardial infarction or peripheral arterial disease)

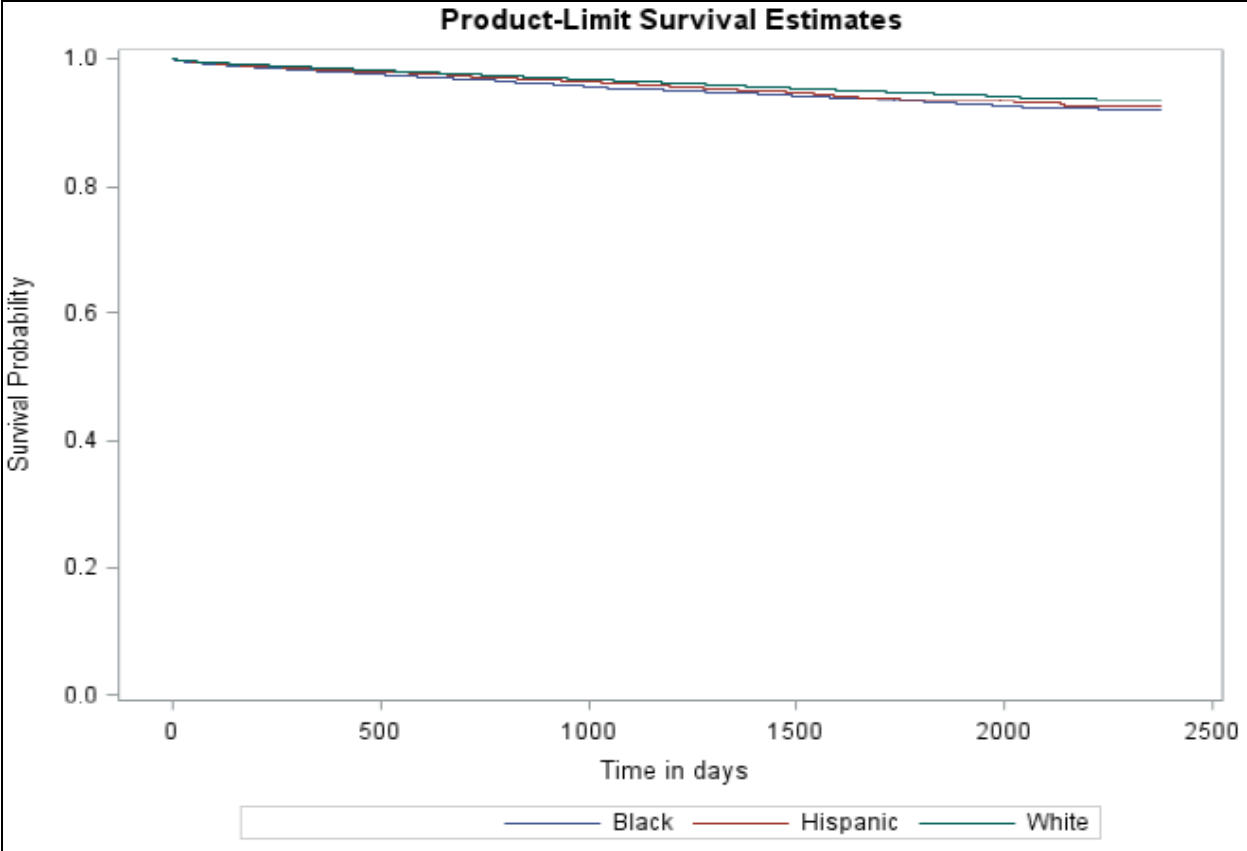

Figure I. Kaplan-Meier curve for ischemic stroke and TIA by race/ethnicity

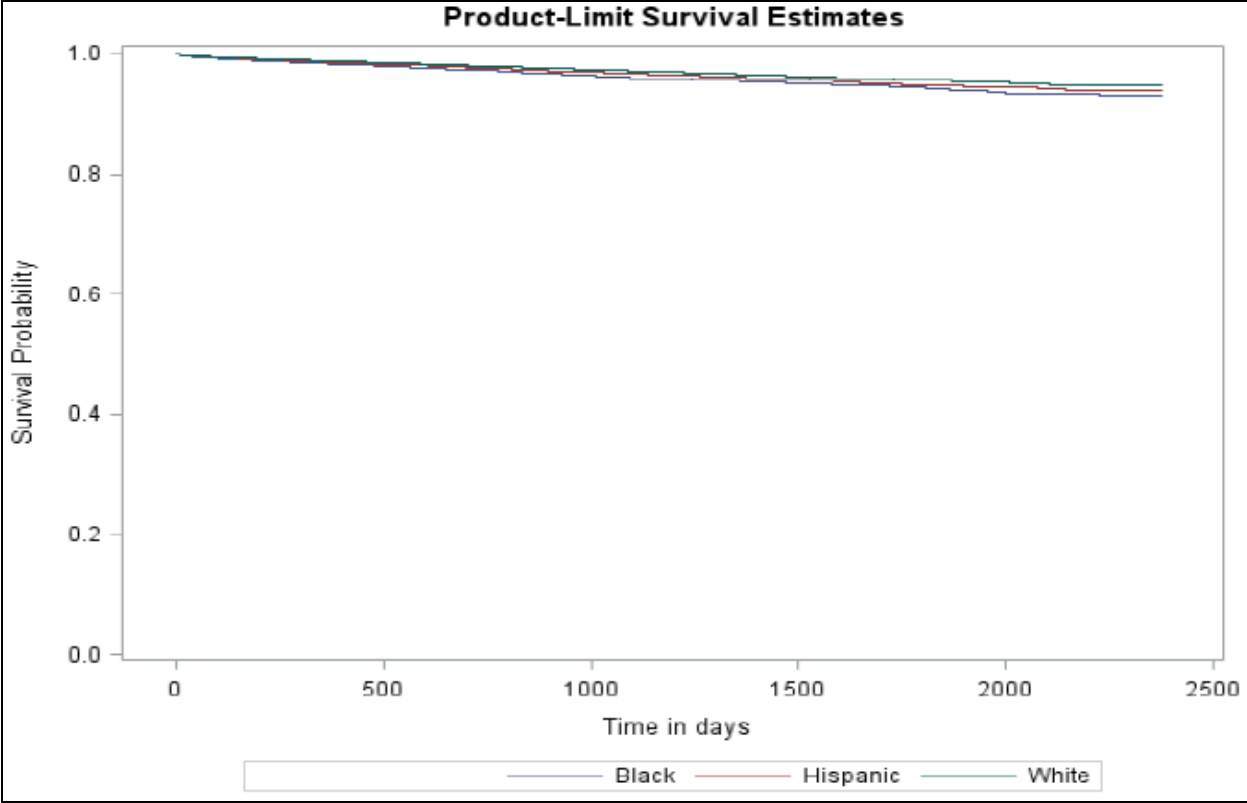

Figure II. Kaplan-Meier curves for ischemic stroke by race/ethnicity



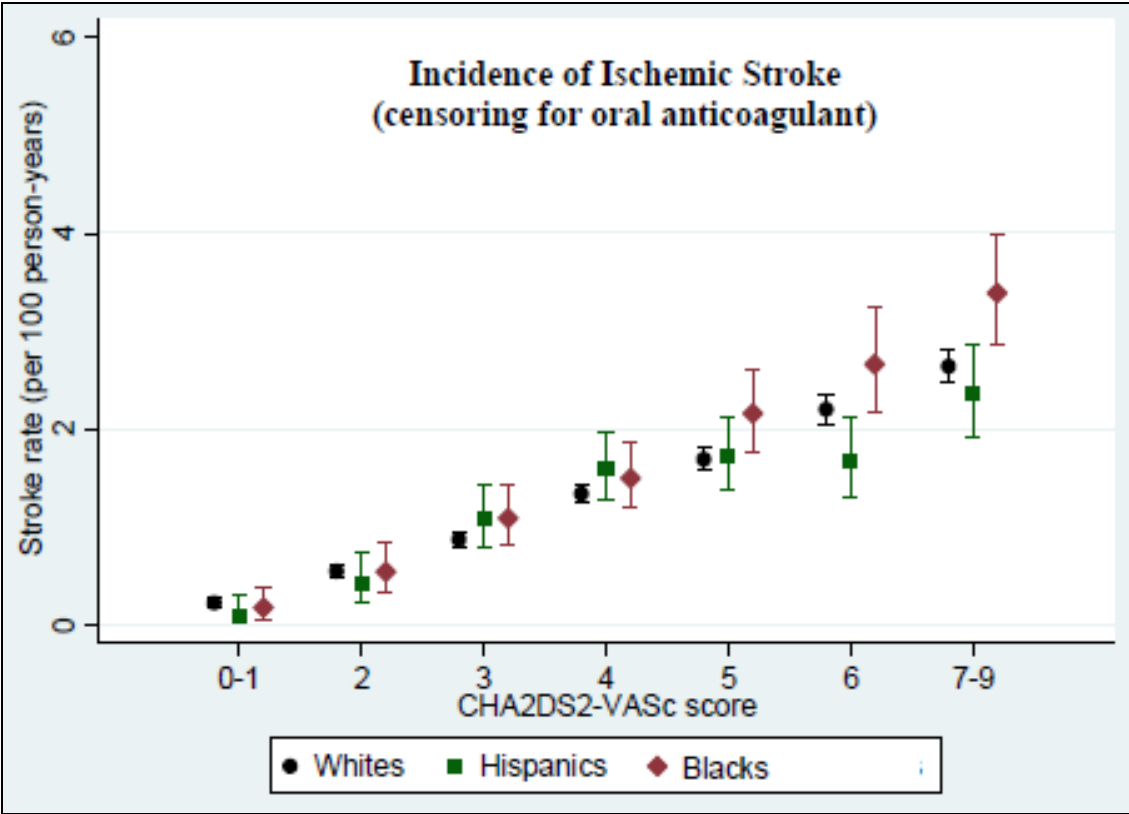

Figure III. Incidence of ischemic stroke or TIA, censoring for oral anticoagulant

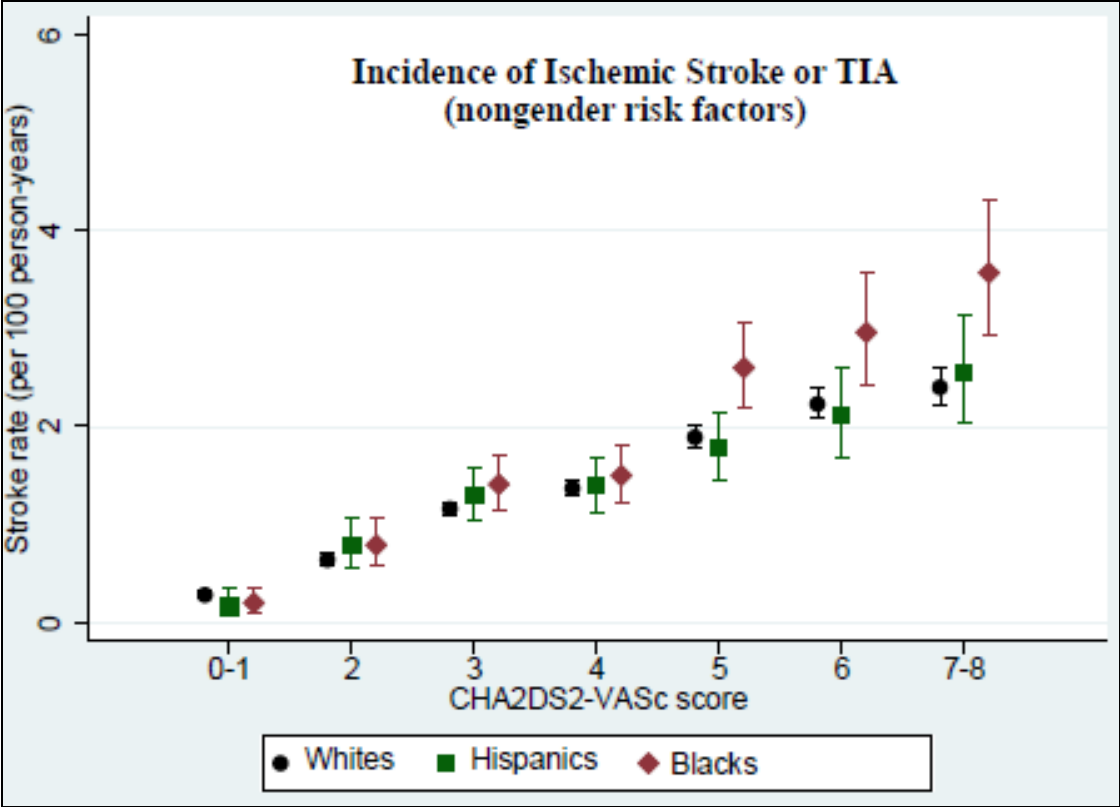

**Figure IV.** Incidence of ischemic stroke or TIA, nongender risk factors
